# Supplementary material for: Phasing and climate forcing potential of the Millennium Eruption of Mt. Baekdu
Source: PubMed Central journal article supplement — Commun Earth Environ. 2024 Oct 1;5(1):549. doi: 10.1038/s43247-024-01713-z (PMC11445055; doi:10.1038/s43247-024-01713-z), 2024-10-01
Supplement: 43247_2024_1713_MOESM3_ESM.pdf [file 43247_2024_1713_MOESM3_ESM.pdf]

Description of Additional Supplementary Files for

**Phasing and climate forcing potential of the Millennium Eruption of Mt. Baekdu**

Giyoon Lee<sup>1</sup>, Andrea Burke<sup>2</sup>, William Hutchison<sup>2</sup>, Patrick Sugden<sup>2</sup>, Celeste Smith<sup>2</sup>, Joseph R. McConnell<sup>3</sup>, Michael Sigl<sup>4</sup>, Clive Oppenheimer<sup>5,6</sup>, Sune Olander Rasmussen<sup>7</sup>, Jørgen Peder Steffensen<sup>7</sup>, Seung Ryeol Lee<sup>8</sup>, Jinho Ahn<sup>1\*</sup>

**File Name:** [Supplementary Data 1]

**Description:** WDS and EDS measurement results of the tephra shards found in NGRIP1 ice core samples

**File Name:** [Supplementary Data 2]

**Description:** Liquid conductivity of the NGRIP1

**File Name:** [Supplementary Data 3]

**Description:** Particle concentrations of the NGRIP1

**File Name:** [Supplementary Data 4]

**Description:** Ion concentrations of the NGRIP1

**File Name:** [Supplementary Data 5]

**Description:** WDS measurement results of the secondary glass standards
